# Supplementary material
Source: PubMed Central journal article supplement (PMC8286295)
Supplement: NIHMS1679621-supplement-1.pdf [file NIHMS1679621-supplement-1.pdf]

| SNP ID           | Position (GRCh37/hg19) | Nearby Genes         |
|------------------|------------------------|----------------------|
| rs9623117        | Chr22:40452119         | TNRC6B               |
| rs6983267        | Chr8:128413305         | CASC8, CCAT2         |
| rs10896449       | Chr11:68994667         | LOC338694*           |
| rs10993994       | Chr10:51549496         | MSMB                 |
| rs817826         | Chr9:110156300         | LINC01509*           |
| rs4242382        | Chr8:128517573         | CASC8*               |
| rs103294         | Chr19:54797848         | LILRB2, LILRA5       |
| rs4749884        | Chr10:9644800          | LINC02663            |
| rs1512268        | Chr8:23526463          | LOC107986930         |
| rs10934853       | Chr3:128038373         | EEFSEC               |
| rs6062509        | Chr20:62362563         | ZGPAT                |
| rs7584330        | Chr2:238387228         | MLPH                 |
| rs11902236       | Chr2:10117868          | GRHL1                |
| rs8102476        | Chr19:38735613         | PPP1R14A             |
| rs12621278       | Chr2:173311553         | ITGA6                |
| <b>rs4713266</b> | <b>Chr6:11219030</b>   | <b>NEDD9</b>         |
| rs10486567       | Chr7:27976563          | JAZF1                |
| rs5759167        | Chr22:43500212         | BIK                  |
| rs6763931        | Chr3:141102833         | ZBTB38               |
| rs1938781        | Chr11:58915110         | FAM111A              |
| rs2273669        | Chr6:109285189         | ARMC2                |
| rs7127900        | Chr11:2233574          | ASCL2*, IGF2*, TH*   |
| rs339331         | Chr6:117210052         | RFX6                 |
| rs7210100        | Chr17:47436749         | ZNF652, LOC102724596 |
| rs684232         | Chr17:618965           | VPS53                |
| rs7611694        | Chr3:113275624         | SIDT1                |
| rs6465657        | Chr7:97816327          | LMTK2                |
| rs2121875        | Chr5:44365545          | FGF10                |
| rs17632542       | Chr19:51361757         | KLK3                 |
| rs1983891        | Chr6:41536427          | FOXP4                |
| rs1894292        | Chr4:74349158          | AFM                  |
| rs1933488        | Chr6:153441079         | RGS17                |
| rs17694493       | Chr9:22041998          | CDKN2B-AS1           |
| rs10875943       | Chr12:49676010         | TUBA1C, PRPH         |
| rs17021918       | Chr4:95562877          | PDLIM5               |
| rs11214775       | Chr11:113807181        | HTR3B                |
| rs1016343        | Chr8:128093297         | PCAT2                |

(\* distance > 20kb)

**Supplementary Figure 1.** Candidate PCa susceptibility SNPs that are associated with men of African descent  
Previous analysis using GWAS database revealed a list of SNPs that are associated with PCa risk and enriched in men of African descent.

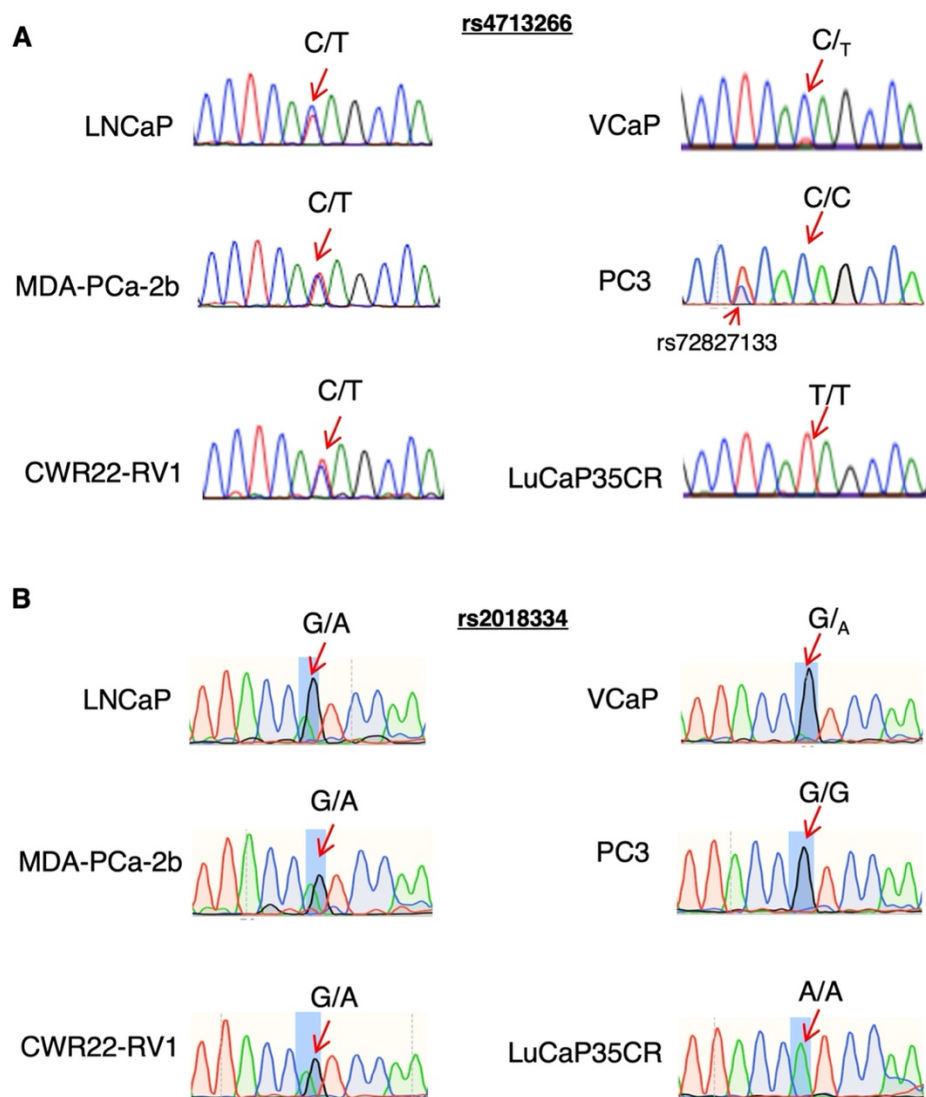

**Supplementary Figure 2.** Genotypes of rs4713266 and rs2018334 for PCa models

(A, B) Multiple PCa cell or xenograft lines were genotyped for rs4713266 (A) or rs2018334 (B) using Sanger sequencing on the PCR amplified genomic DNA fragments. LNCaP, MDA-PCa-2b, and CWR22-RV1 lines are heterozygous for both risk and non-risk alleles. VCaP line has gene amplification of the risk allele but may still contain a copy of the non-risk allele. PC-3 line is homozygous for risk alleles but also contains heterozygous T/C for a nonrelevant SNP rs72827133. LuCaP35CR (*TMPRSS2-ERG* positive) is homozygous for non-risk alleles.

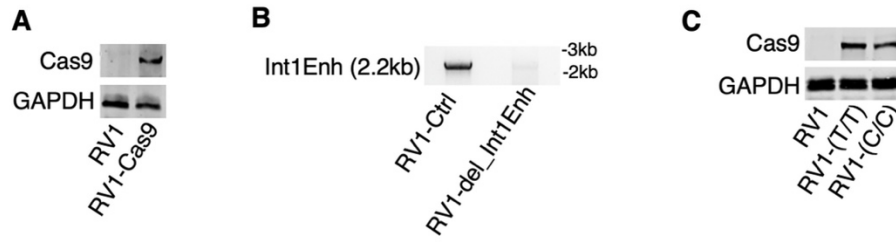

**Supplementary Figure 3.** CWR22-RV1 cells with CRISPR/Cas9 editing in NEDD9-Int1Enh region

**(A)** Immunoblotting for Cas9 (anti-Cas9, ab210572, Abcam) in the previously established Cas9-expressing CWR22-RV1 stable cells. **(B)** Confirmation of Int1Enh deletion in CWR22-RV1-del\_Int1Enh cells by PCR amplifying the enhancer region (~2.2kb) of genomic DNA. The primer sequences are: forward, 5'-TAAATGTCATCAGATTCCAACACAG-3' and reverse, 5'-CTACAAGTCACACCTCTCCGT-3'. **(C)** Immunoblotting for Cas9 in CWR22-RV1-T/T and -C/C isogenic cell lines.

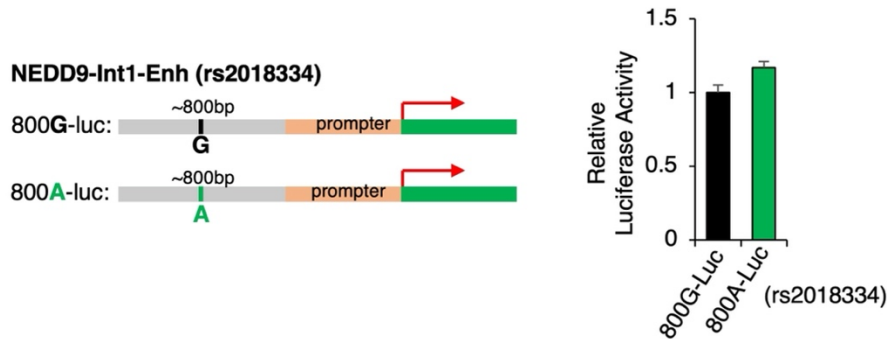

**Supplementary Figure 4.** The nucleotide variation at rs2018334 does not significantly alter the reporter activity. DNA fragments (~800bp) containing G or A of rs2018334 were cloned into a luciferase reporter system containing a minimum promoter (800C-Luc and 800T-Luc). PC-3 cells were then transfected with 800C-Luc versus 800T-Luc and the luciferase activities were examined.

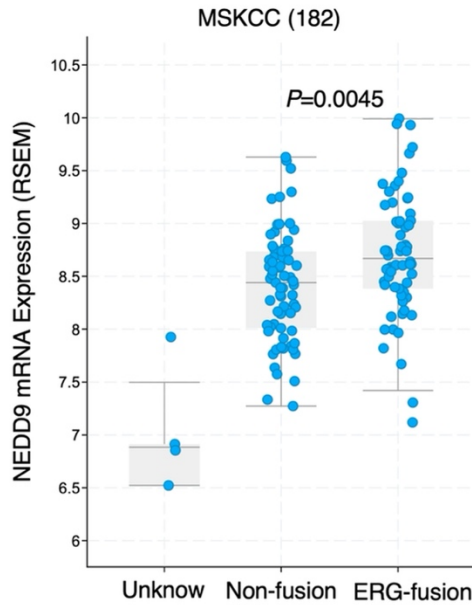

**Supplementary Figure 5.** *NEDD9* expression is increased in ERG fusion-positive PCa of MSKCC cohort

Using provided online tools from cBioPortal, *NEDD9* expression was examined in fusion-positive versus fusion negative PCa of MSKCC cohort (Taylor PCa).

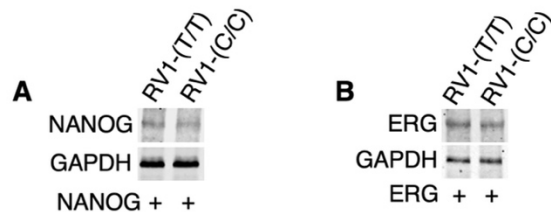

**Supplementary Figure 6.** Transfection of NANOG and ERG in CWR222-RV1 isogenic cell lines

(**A, B**) Immunoblotting for NANOG (A) or ERG (B) in the CWR22-RV1 isogenic cell lines transfected by NANOG or ERG expressing plasmids.
